# Supplementary material
Source: publisher site journal article supplement (https://www.spandidos-publications.com/6975/downloadSupplementary)

Figure S1. Survival analysis plots. Kaplan-Meier curves of the overall survival stratified by (A) *HYOU1*, (B) *SMG5* and (C) *ANKLE2* expression levels in The Cancer Genome Atlas-cervical cancer-1 dataset. CI, confidence interval; HR, hazard ratio; *HYOU1*, hypoxia-upregulated 1 gene; *SMG5*, nonsense-mediated mRNA decay factor; *ANKLE2*, ankyrin repeat and LEM domain containing 2.

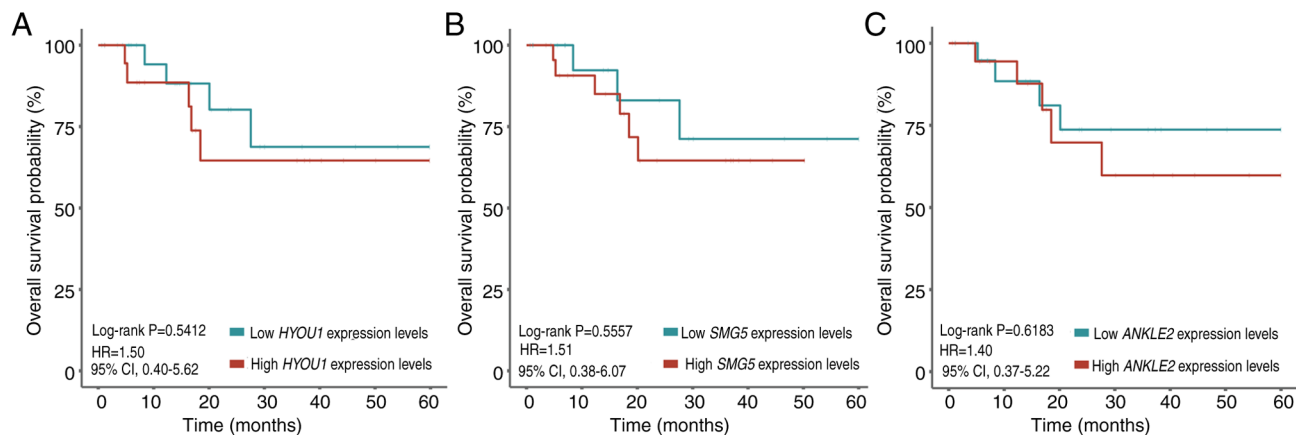

Figure S2. Knockdown efficiency of HYOU1. HYOU1 protein expression levels in DDP-resistant HeLa cells treated with DDP and siRNA (HYOU1 siRNA or siRNA NC) or DDP alone was detected using western blotting (n=4). \*\*\*P<0.001. The statistical difference among multiple groups was analyzed using one-way analysis of variance and Tukey's test. NC, negative control; HYOU1, hypoxia-upregulated 1 gene; DDP, cisplatin; siRNA, small interfering RNA.

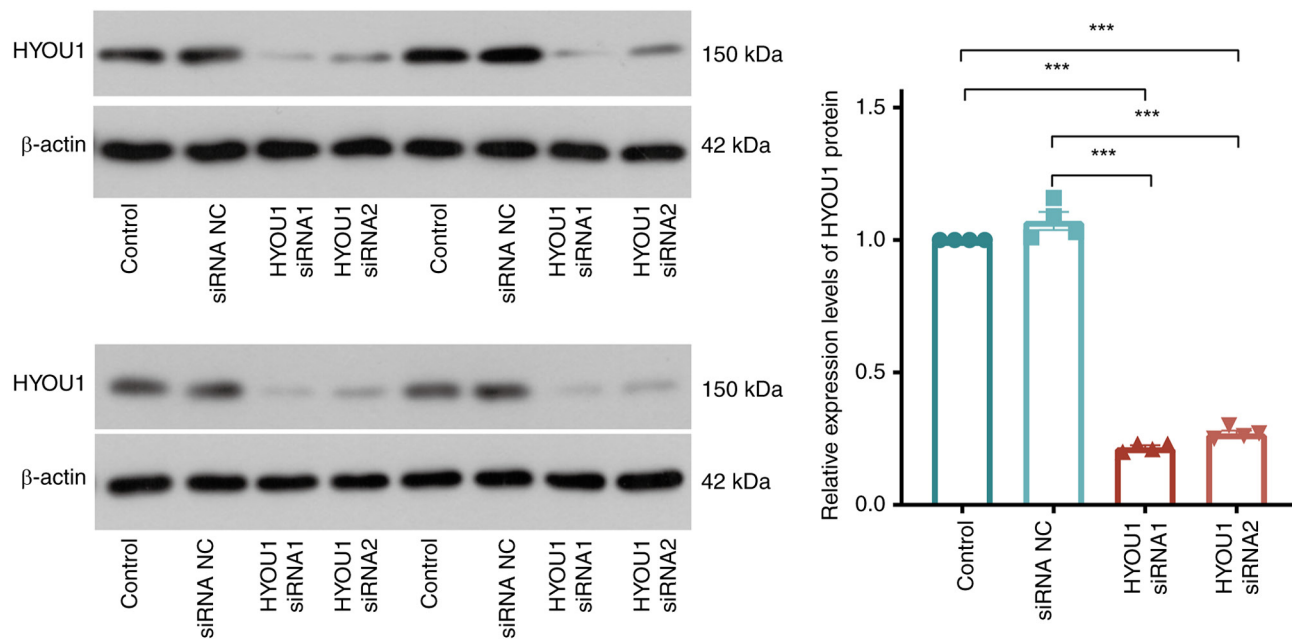

Supplement: Supplementary file 1 [file downloadSupplementary]
